# Supplementary material
Source: ML conference proceedings conference paper supplement (https://openreview.net/forum?id=chH4gO2tZT)

Machine Learning Course (MSc)  
February 2020

ML 1 Quiz (11/12)

051

### We should invest more effort in improving

machine intelligence

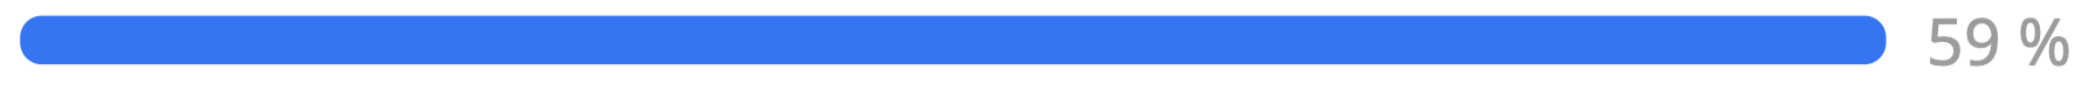

human intelligence

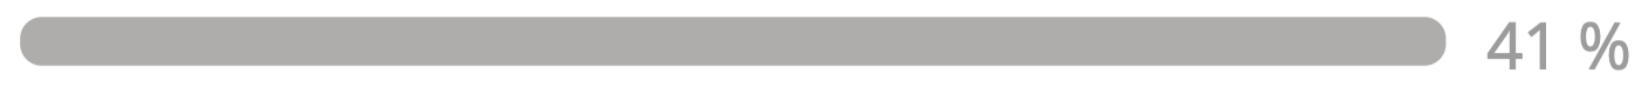

Learning from Data Course (UG)  
February 2020

LfD 1 Quiz (10/11)

089

### We should invest more effort in improving

machine intelligence

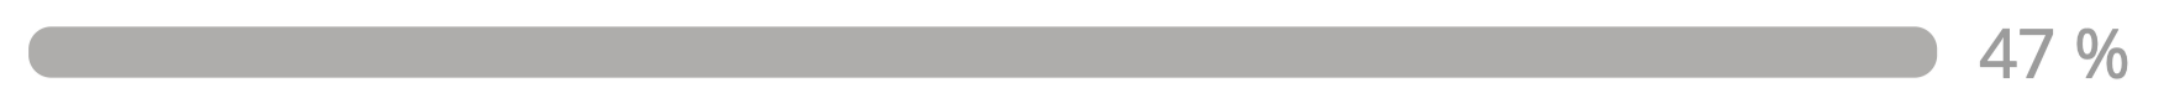

human intelligence

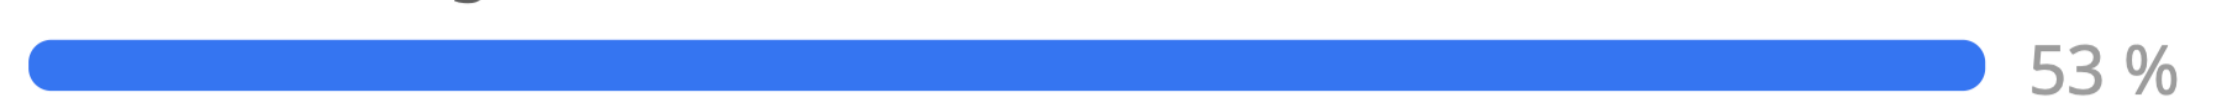

Deep Graph Learning Course (MSc)  
Jan 2024

Survey (8/8)

106

### We should invest more effort in improving

machine intelligence

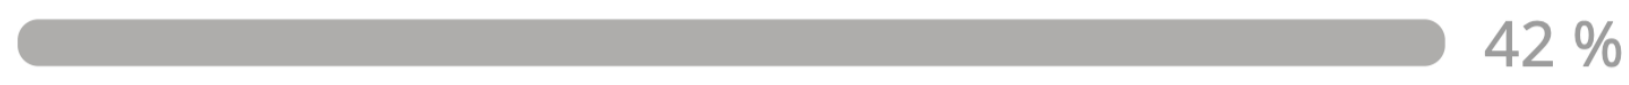

human intelligence

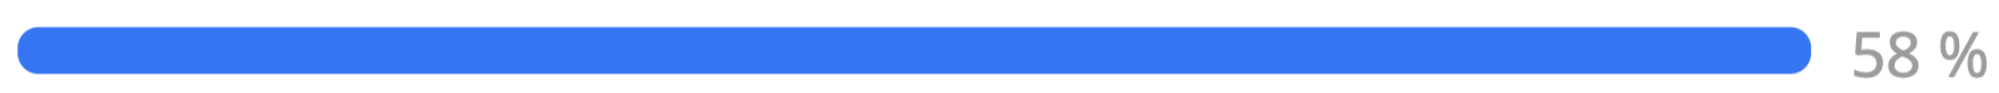

Deep Graph Learning Course (MSc)  
Jan 2025

Introduction (8/9)

113

### We should invest more effort in improving

machine intelligence

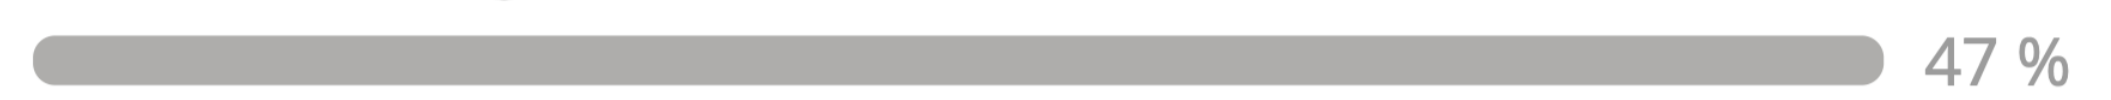

human intelligence

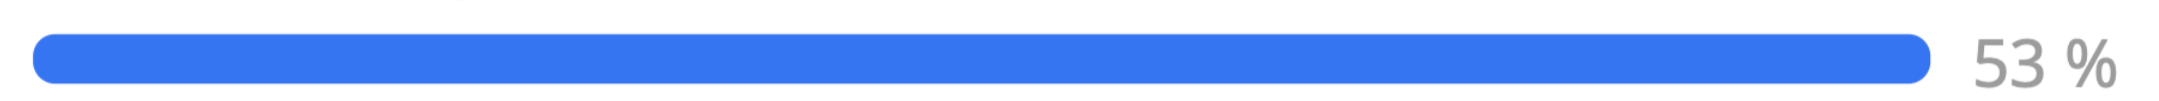

Deep Graph Learning Course (MSc)  
Jan 2026

Introduction (8/11)

065

### We should invest more effort in improving

machine intelligence

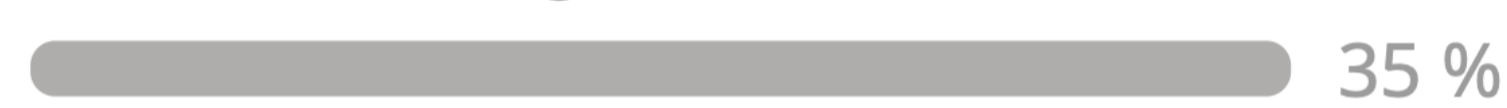

human intelligence

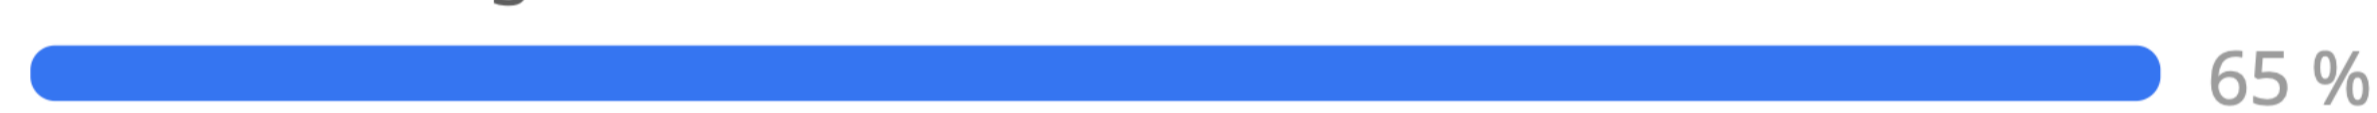

Design Thinking for AI Course (MSc)  
Jan 2025

Introduction (11/11)

026

### We should invest more effort in improving

machine intelligence

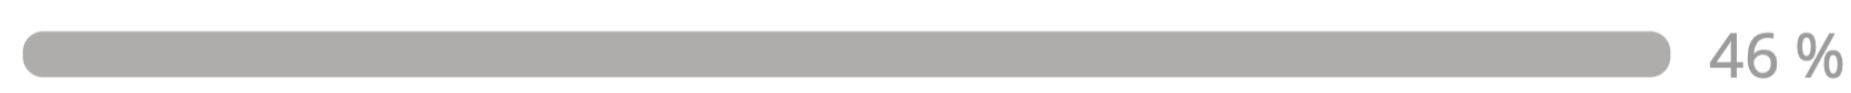

human intelligence

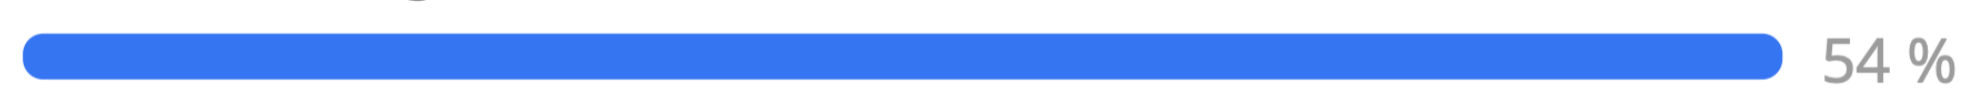

Design Thinking for AI Course (MSc)  
Jan 2026

Introduction (12/12)

021

### We should invest more effort in improving

machine intelligence

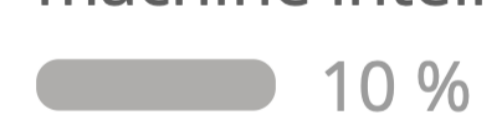

human intelligence

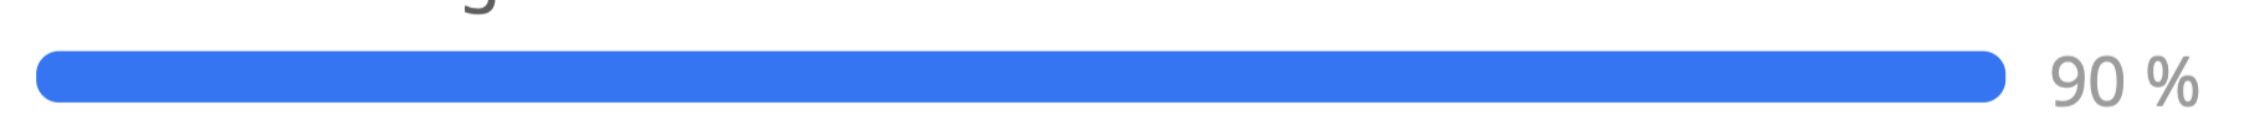

Supplement: supplementary_material [file attachment]
